# Supplementary material
Source: ML conference proceedings conference paper supplement (https://openreview.net/forum?id=-GLNZeVDuik)
Supplement: supplementary_material [file attachment]

## A VISUALIZATIONS AND DETAILS ON ENCODING DISTRIBUTIONS

In the following, we visualize the different encoding distributions we tested in Categorical Normalizing Flows, and outline implementation details for full reproducibility.

### A.1 MIXTURE OF LOGISTICS

The mixture model represents each category by an independent logistic distribution in continuous latent space, as visualized in Figure 5. Specifically, the encoder distribution  $q(\mathbf{z}|\mathbf{x})$ , with  $\mathbf{x}$  being the categorical input and  $\mathbf{z}$  the continuous latent representation, can be written as:

$$q(\mathbf{z}|\mathbf{x}) = \prod_{i=1}^N g(\mathbf{z}_i|\mu(x_i), \sigma(x_i)) \quad (8)$$

$$g(\mathbf{v}|\mu, \sigma) = \prod_{j=1}^d \frac{\exp(-\epsilon_j)}{(1 + \exp(-\epsilon_j))^2} \text{ where } \epsilon_j = \frac{v_j - \mu_j}{\sigma_j} \quad (9)$$

$g$  represent the logistic distribution, and  $d$  the dimensionality of the continuous latent space per category. Both parameters  $\mu$  and  $\sigma$  are learnable parameter, which can be implemented via a simple table lookup. For decoding the discrete categorical data from continuous space, the true posterior is calculated by applying the Bayes rule:

$$p(x_i|\mathbf{z}_i) = \frac{\tilde{p}(x_i)q(\mathbf{z}_i|x_i)}{\sum_{\hat{x}} \tilde{p}(\hat{x})q(\mathbf{z}_i|\hat{x})} \quad (10)$$

where the prior over categories,  $\tilde{p}(x_i)$ , is calculated based on the category frequencies in the training dataset. Although the posterior models a distribution over categories, the distribution is strongly peaked for most continuous points in the latent space as the probability steeply decreases the further a point is away from a specific mode. Furthermore, the distribution is trained to minimize the posterior entropy which pushes the posterior to be deterministic for commonly sampled continuous points. Hence, the posterior partitions the latent space into fragments in which all continuous points are assigned to one discrete category. The borders between the fragments, where the posterior is not close to deterministic, are small and very rarely sampled by the encoder distribution. We visualized the partitioning for an example of three categories in Figure 5.

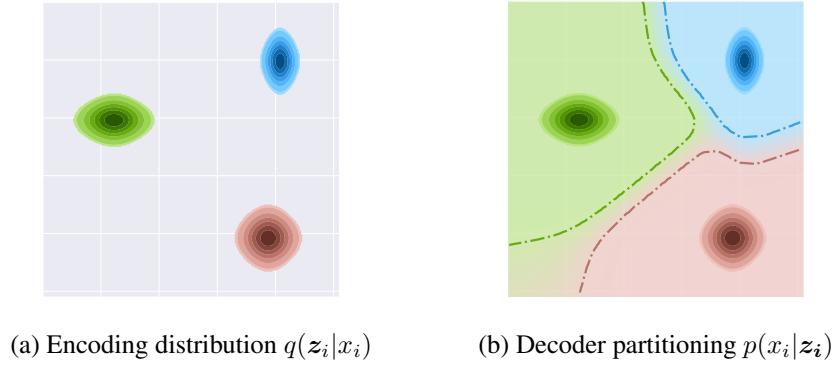

Figure 5: Visualization of the mixture model encoding and decoding for 3 categories. Best viewed in color. (a) Each category is represented by a logistic distribution with independent mean and scale which are learned during training. (b) The posterior partitions the latent space which we visualize by the background color. The borders show from when on we have an almost unique decoding of the corresponding mixture ( $> 0.95$  decoding probability). Note that these borders do not directly correspond to the euclidean distance as we use logistic distributions instead of Gaussians.

Notably, the posterior can also be learned by a second, small linear network. While this possibly introduces a difference between encoder and decoder, we experienced it to vanish quickly over training iterations and did not observe any significant difference compared to using the Bayes posterior besides a slower training in the very early stages of training. Additionally, we were able

to achieve very low reconstruction errors in two dimensions for most discrete distributions of  $\leq 50$  categories. Nevertheless, higher dimensionality of the latent space is not only crucial for a large number of categories as for word-level vocabularies but can also be beneficial for more complex problems. Still, using even higher dimensionality rarely caused any problems or showed significantly decreasing performance. Presumably, the flow learns to ignore latent dimensions if those are not needed for modeling the discrete distribution. To summarize, the dimensionality of the latent space should be considered as important, but robust hyperparameter which can be tuned in an early stage of hyperparameter search.

In the very first training iterations, it can happen that the mixtures of multiple categories are at the exact same spot and have troubles to clearly separate. This can be easily resolved by either weighing the reconstruction loss slightly higher for the first  $\sim 500$  iterations or initializing the mean of the mixtures with a higher variance. Once the mixtures are separated, the model has no incentive to group them together again as it has started to learn the underlying discrete distribution which results in a considerably higher likelihood than a plain uniform distribution.

#### A.1.1 KL DIVERGENCE

The objective for learning categorical normalizing flows with a mixture encoding, shown in Equation 3, constitutes a lower bound. The variational gap between the objective and the evidence  $\log P_{\text{model}}$  is given by the KL divergence between the approximate posterior  $q(\mathbf{z}|\mathbf{x})$ , and the true posterior  $p(\mathbf{z}|\mathbf{x})$ :  $D_{KL}(q(\mathbf{z}|\mathbf{x})||p(\mathbf{z}|\mathbf{x}))$ . The advantage of using the mixture encoding is that by replacing the decoder by a Bayes formulation of the encoder, as in Equation 10, we introduce a dependency between  $q(\mathbf{z}|\mathbf{x})$  and  $p(\mathbf{z}|\mathbf{x})$ . Specifically, we can rewrite the true posterior as:

$$p(\mathbf{z}|\mathbf{x}) = \frac{p(\mathbf{x}|\mathbf{z})p(\mathbf{z})}{p(\mathbf{x})} \quad (11)$$

$$= \frac{\prod_i p(x_i|\mathbf{z}_i)p(\mathbf{z})}{p(\mathbf{x})} \quad (12)$$

$$= \left( \prod_i \frac{q(\mathbf{z}_i|x_i)p(x_i)}{\sum_{\hat{x}} q(\mathbf{z}_i|\hat{x})p(\hat{x})} \right) \frac{p(\mathbf{z})}{p(\mathbf{x})} \quad (13)$$

$$= \prod_i q(\mathbf{z}_i|x_i) \cdot \frac{\prod_i p(x_i)}{p(\mathbf{x})} \cdot \frac{p(\mathbf{z})}{\prod_i q(\mathbf{z}_i)} \quad (14)$$

$$= q(\mathbf{z}|\mathbf{x}) \cdot \frac{p(\mathbf{z})}{p(\mathbf{x})} \cdot \prod_i \frac{p(x_i)}{q(\mathbf{z}_i)} \quad (15)$$

Intuitively, this makes it easier for the model to tighten the gap because a change in  $q(\mathbf{z}|\mathbf{x})$  entails a change in  $p(\mathbf{z}|\mathbf{x})$ . In experiments, we observe the difference by a considerably faster optimization in the first steps during iteration. However, once the decoder is close to deterministic, both approaches with the Bayes formulation and the separate network will reach a similar variational gap as  $p(\mathbf{x}|\mathbf{z})$  will drop out of the Equation 11 with being 1.

Note that this variational gap is very similar to that from variational dequantization for integers, which is being used in most SOTA image modeling architectures. The difference to dequantization is that the decoder  $p(x_i|\mathbf{z}_i)$  has been manually fixed, but yet represents the Bayes formulation of the encoder  $q(\mathbf{z}|\mathbf{x})$  (the latent variable  $\mathbf{z}$  represents  $\mathbf{x} + \mathbf{u}$  here, i.e. the original integers with a random variable  $\mathbf{u}$  between 0 and 1).

#### A.1.2 TRAINING AND TESTING

Below, we lay out the specifics for training and testing a categorical normalizing flow with the logistic mixture encoding. Training and testing are almost identical to normalizing flows trained on image modeling, except for the loss calculation and encoding. Algorithm 1 shows the training procedure. First of all, we determine the prior  $p(x_i)$  over categories, which can be done by counting the number of occurrences of each category and divide by the sum of all. The difference between the prior probabilities in the training and testing is usually neglectable, while the training set commonly is

larger and hence provides a better overall data statistic. After this, the training can start by iterating over batches in the training set  $\mathcal{D}$ . For encoding, we can make use of the reparameterization trick and simply shift and scale the samples of a standard logistic distribution. The loss is the lower bound of Equation 3.

---

**Algorithm 1** Training procedure for the logistic mixture encoding in CNFs
 

---

- 1: Calculate prior probabilities  $p(x_i)$  on the training dataset;
  - 2: **for**  $x \in \mathcal{D}$  **do**
  - 3:   Sample a random logistic variable  $z'$ :  $z' \sim \text{LogisticDist}(0, 1)$ ;
  - 4:   Reparameterization trick for encoding:  $z_i = z'_i \cdot \sigma(x_i) + \mu(x_i)$
  - 5:   Negative log-likelihood calculation  $\mathcal{L} = -\log \left( p_{\text{model}}(z) \prod_{i=1}^S \frac{\bar{p}(x_i)}{\sum_{\hat{x}} \bar{p}(\hat{x}) q(z_i|\hat{x})} \right)$  (Eq. 3)
  - 6:   Minimize loss  $\mathcal{L}$  by updating parameters in  $p_{\text{model}}(z)$  and  $q(z_i|x_i)$ ;
  - 7: **end for**
- 

During testing, we make use of importance sampling to tighten the gap, given that  $\log \mathbb{E}_x [p(x)] \geq \mathbb{E}_x \left[ \log \frac{1}{N} \sum_{n=1}^N p(x_n) \right] \geq \mathbb{E}_x [\log p(x)]$  (Burda et al., 2016). This is again a standard technique for evaluating normalizing flows on images, and can improve the bits per dimension score slightly. In our experiments however, we did not experience a significant difference between  $N = 1$  and  $N = 1000$ . The bits per dimension score is calculated by using the log with base 2 on the likelihood, and divide it by the number of dimensions/elements in categorical space (denoted by  $S$ ).

---

**Algorithm 2** Test procedure for the logistic mixture encoding in CNFs. We use  $N = 1000$  in our experiments, although the difference between  $N = 1$  and  $N = 1000$  was marginal for most cases.
 

---

- 1: **for**  $x \in \mathcal{D}$  **do**
  - 2:   **for**  $n = 1, \dots, N$  **do**
  - 3:     Encode  $x$  as continuous variable  $z$ :  $z \sim q(z|x)$ ;
  - 4:     Determine likelihood  $\mathcal{L}_n = p_{\text{model}}(z) \prod_i \frac{\bar{p}(x_i)}{\sum_{\hat{x}} \bar{p}(\hat{x}) q(z_i|\hat{x})}$ ;
  - 5:   **end for**
  - 6:   Determine bits per dimension score:  $-\log_2 \left[ \frac{1}{N} \sum_{n=1}^N \mathcal{L}_n \right] / S$ ;
  - 7: **end for**
- 

### A.1.3 EXAMPLE ENCODING ON MOLECULE GENERATION

An example of a trained model encoding is shown in Figure 6. Here, we visualize the encoding of the edge attributes in GraphCNF trained the molecule generation. In this setup, we have 3 categories, representing the single, double and triple bond. While the single bond category is clearly the dominant one due to the higher prior probability, we did not observe any specific trends across trained models of the position or scale of the distributions.

Visualizations on graph coloring show similar behavior as Figure 5 because all three categories have the same prior probability. Other encoding distributions such as the node types (atoms) cannot be so easily visualized because of their higher dimensionality than 2. We tried applying dimensionality reduction techniques for those but experienced that those do not capture the distribution shape well.

### A.2 LINEAR FLOWS

The flexibility of the mixture model can be increased by applying normalizing flows on each mixture that dependent on the discrete category. We refer to this approach as *linear flows* as the flows are applied for each categorical input variable independently. We visualize possible encoding distributions

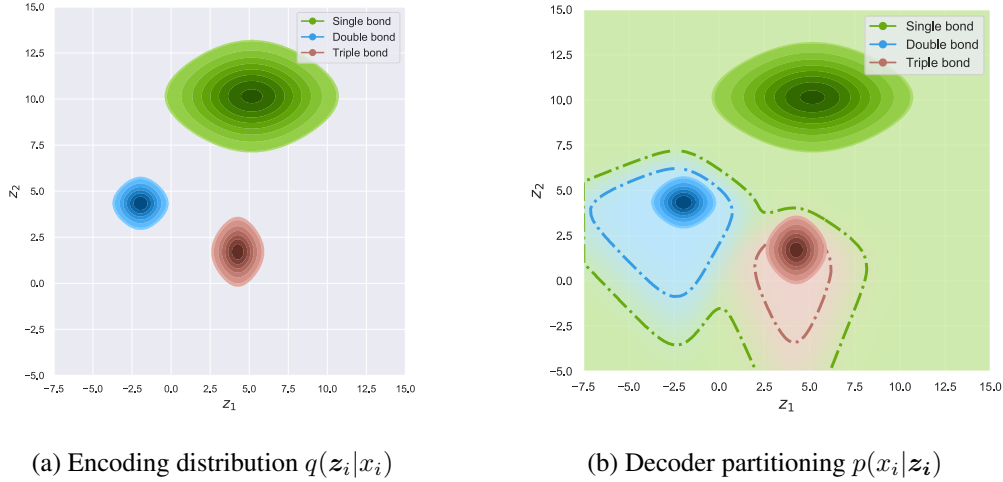

Figure 6: Visualization of the mixture model encoding of the edge attributes for a trained model on molecule generation. The majority of the space is assigned to category 1, the single bond, as it is by far the most common edge type. Across multiple models however, we did not see a consistent trend of position/standard deviation of each category’s encoding.

with linear flows in Figure 7. Formally, we can write the distribution as:

$$q(\mathbf{z}|\mathbf{x}) = \prod_{i=1}^N q(\mathbf{z}_i|x_i) \quad (16)$$

$$q(\mathbf{z}^{(K)}|x_i) = g(\mathbf{z}^{(0)}) \cdot \prod_{k=1}^K \left| \det \frac{\partial f_k(\mathbf{z}^{(k-1)}; x_i)}{\partial \mathbf{z}^{(k-1)}} \right| \quad \text{where } \mathbf{z}_i = \mathbf{z}^{(K)} \quad (17)$$

where  $f_1, \dots, f_K$  are invertible, smooth mappings. In particular, we use here again a sequence of coupling layers with activation normalization and invertible 1x1 convolutions (Kingma and Dhariwal, 2018). Both the activation normalization and coupling use the category  $x_i$  as additional external input to determine their transformation parameters by a neural network. The class-conditional transformations could also be implemented by storing  $K$  parameter sets for the coupling layer neural networks, which is however inefficient for a larger number of categories. Furthermore, in coupling layers, we apply a channel mask that splits  $\mathbf{z}_i$  over latent dimensionality  $d$  into two equally sized parts, of which one is transformed using the other as input.

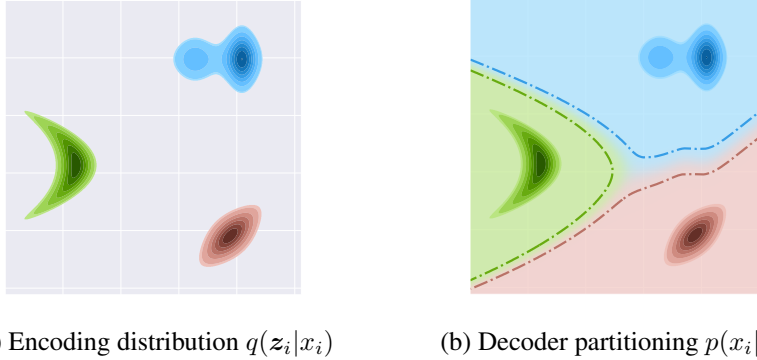

Figure 7: Visualization of the linear flow encoding and decoding for 3 categories. Best viewed in color. (a) The distribution per category is not restricted to a simple logistic and can be multi-modal, rotated or transformed even more. (b) The posterior partitions the latent space which we visualize by the background color. The borders show from when on we have an almost unique decoding of the corresponding category distribution ( $> 0.95$  decoding probability).

Similarly to the mixture model, we can calculate the true posterior  $p(x_i|z_i)$  using the Bayes rule. Thereby, we sample from the flow for  $x_i$  and need to inverse the flows for all other categories. Note that as the inverse of the flow also needs to be differentiable in this situation, we apply affine coupling layers instead of logistic mixture layers. However, this gets computationally expensive for more than 20 categories, and thus we used a single-layer linear network as posterior in these situations. The partitions of the latent space that can be learned by the encoding distribution are much more flexible, as illustrated in Figure 7.

We experimented with increasing sizes of linear flows but noticed that the encoding distribution usually fell back to rotated logistic distributions. The fact that the added complexity and flexibility by the flows are not being used further supports our observation that mixture models are indeed sufficient for representing categorical data well in normalizing flows.

### A.3 VARIATIONAL ENCODING

The third encoding distribution we experimented with is inspired by variational dequantization (Ho et al., 2019) and models  $q(z|x)$  by one flow across all categorical variables. Still, the posterior,  $p(x_i|z_i)$ , is applied per categorical variable independently to maintain unique decoding and partitioning of the latent space. The normalizing flow again consists of a sequence of logistic mixture coupling layers with activation normalization and invertible 1x1 convolutions. The inner feature network of the coupling layers depends on the task the normalizing flow is applied on. Hence, for sets, we used a transformer architecture, while for the graph experiments, we used a GNN. On the language modeling task, we used a Bi-LSTM model to generate the transformation parameters. All those networks use the discrete, categorical data  $x$  as additional input.

As the true posterior cannot be found for this distribution, we apply a two-layer linear network to determine  $p(x_i|z_i)$ . While the reconstruction error was again very low, we again experienced that the model mainly relied on a logistic mixture model, even if we initialize it differently beforehand. Variational dequantization is presumably important for images as every pixel value has its own independent Gaussian noise signal. This noise can be nicely modeled by flexible dequantization distributions which need to be complex enough to capture the true mean and variance of this Gaussian noise. In categorical distributions, however, we do not have such noise signals and therefore seem not to benefit from variational encodings.

### A.4 LATENT NORMALIZING FLOW

#### A.4.1 ENCODING VISUALIZATION

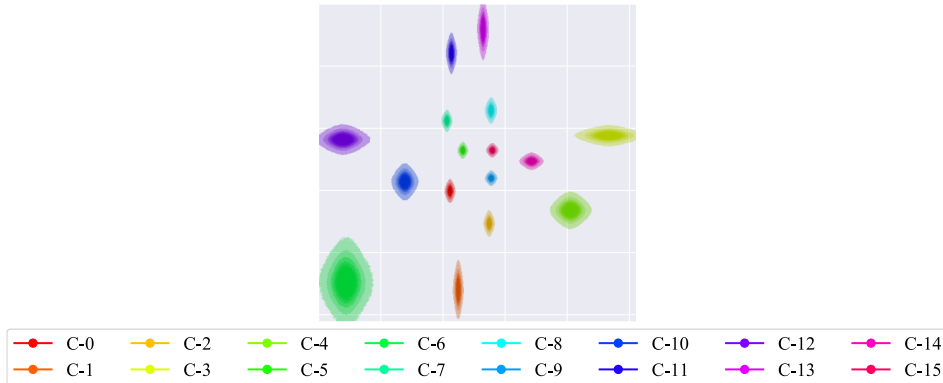

Figure 8: Visualization of the encoding distribution  $q(z|x)$  of latent NF on set summation.

In this section, we show visualizations of the learned encoding distribution of Latent NF (Ziegler and Rush, 2019) on the task of set summation. As shown in Figure 8, the encoder learned a clear mixture distribution although not being restricted too. This shows that the possible complexity in the decoder is not being used. The figure was generated by sampling 5,000 examples and merging them into one plot. Each latent variable  $z_i$  is two dimensional, hence our two-dimensional plot. The

colors represent different categories. For readability, each color is normalized independently (i.e. highest value 1, lowest 0) as otherwise, the colors of the stretched mixtures would be too low. For visualizations of the latent space in language modeling, we refer the reader to Ziegler and Rush (2019).

#### A.4.2 LOSS COMPARISON

In the following, we compare LatentNF and CNF on their training behavior and loss fluctuation. Figure 9 visualizes the loss curve for both models on the task of language modeling, trained on the text8 dataset (Mahoney, 2011). Note that both models use the same hyperparameters and model except that the reconstruction loss is weighted 10 times higher in the first 5k iterations, and decays exponentially over consecutive iterations. This is why the initial loss of LatentNF is higher, but the reconstruction loss becomes close to zero after 3k iterations in the example of Figure 9. Interestingly, we experience high fluctuations of the loss with LatentNF during the first iterations. Although Figure 9 shows only a single run, similar fluctuations have occurred in all trained LatentNF models but at different training iterations. Hence, we decided to plot a single loss curve instead of the average of multiple. The fluctuations can most likely be explained by the need for a strong loss scheduling. At the beginning of the training, the decoder loss is weighted significantly higher than the prior component. Thus, the backpropagated gradients mostly focus on the decoder, which can peak for rare categories/occurrences in the dataset. These peaks cause the encoding distribution to change abruptly, and the prior has to adapt to these changes within the next iterations. However, this can again lead to a high loss when the transformations in the prior do not fit to the new encoding, and thus map them to points of low likelihood. Thus, we see a loss peak across a couple of iterations until the model balances itself out again.

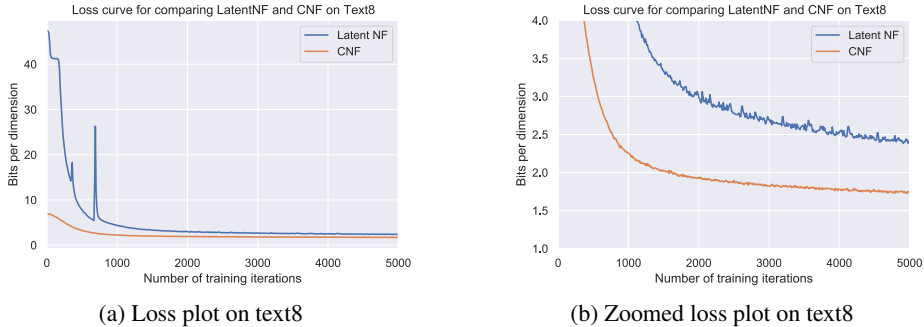

Figure 9: Plotting the loss over batch iterations on the language modeling dataset text8 for LatentNF and CNF. The batch size is 128, and we average the loss over the last 10 iterations. Sub-figure (b) shows a zoomed version of sub-figure (a) to show the larger fluctuation even on smaller scale, while CNF provides a smooth optimization.

Similarly, when training on Wikitext103 (Merity et al., 2017), we experience even more frequent peaks in the loss, as Wikitext103 with 10k categories contains even more rare occurrences (see Figure 10). Reducing the learning rate did not show to improve the stability while considerably increasing the training time. When reducing the weight of the decoder, the model was not able to optimize as well as before and usually reached bits per dimension scores of 10-20.

## B IMPLEMENTATION DETAILS OF GRAPHCNF

In this section, we describe further implementation details of GraphCNF. We detail the implementation of the Edge-GNN model used in the coupling layers of GraphCNF, and discuss how we encode graphs of different sizes.

### B.1 EDGE GRAPH NEURAL NETWORK

GraphCNF implements a three-step generation approach, for which the second and third step also models latent variables for edges. Hence, in the coupling layers, we need a graph neural network

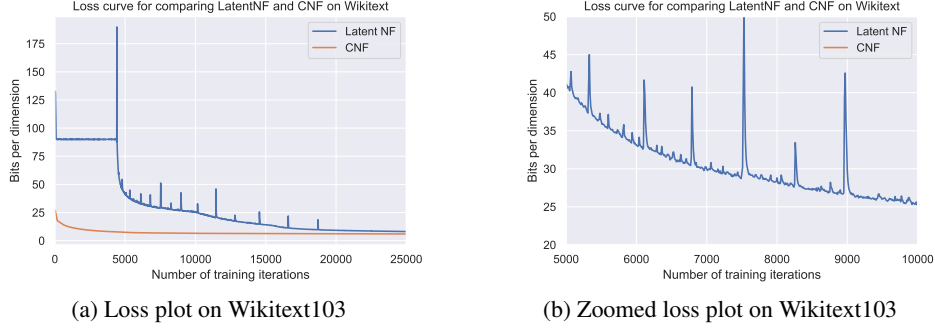

Figure 10: Plotting the loss over batch iterations on the language modeling dataset Wikitext103 for LatentNF and CNF. The batch size is 128, and we average the loss over the last 10 iterations. Sub-figure (b) shows a zoomed version of sub-figure (a) to show the details of the peaks in LatentNF’s loss curve.

which supports both node and edge features. We implement this by alternating between updates of the edge and the node features. Specifically, given node features  $v^t$  and edge features  $e^t$  at layer  $t$ , we update those as follows:

$$v^{t+1} = f_{node}(v^t; e^t) \quad (18)$$

$$e^{t+1} = f_{edge}(e^t; v^{t+1}) \quad (19)$$

The update functions,  $f_{node}$  and  $f_{edge}$ , are both common GNN layers with slight adjustments to allow a communication between nodes and edges. Before detailing the update layers, it should be noted that we use Highway GNNs (Rahimi et al., 2018) which apply a gating mechanism. Specifically, the updates for the nodes are determined by:

$$v^{t+1} = v^t \cdot T(\tilde{v}^{t+1}) + H(\tilde{v}^{t+1}) \cdot (1 - T(\tilde{v}^{t+1})) \quad (20)$$

where  $\tilde{v}^{t+1}$  is the output of the GNN layer.  $H$  and  $T$  represent single linear layer networks where  $T$  has a consecutive sigmoid activation to limit the outputs between 0 and 1. The edge updates are applied in the similar manner. We experienced that such a gated update functions helps the gradient flow through the layers back to the input. This is important for normalizing flows as coupling layers or transformations in general strongly depend on previous transformations. Hence, we apply the same gating mechanism in the first step of GraphCNF,  $f_1$ .

Next, we detail the GNN layers to obtain  $\tilde{e}^{t+1}$  and  $\tilde{v}^{t+1}$ . The edge update layer  $f_{edge}$  resembles a graph convolutional layer (Zhou et al., 2018), and can be specified as follows:

$$\tilde{e}_{ij}^{t+1} = g(W_e e_{ij}^t + W_v v_i^t + W_v v_j^t) \quad (21)$$

where  $e_{ij}^t$  represents the features of the edge between node  $i$  and  $j$ .  $g$  stands for a GELU (Hendrycks and Gimpel, 2016) non-linear activation. Using more complex transformations did not show to significantly improve the performance of GraphCNF.

To update the node representations, we took inspiration of the transformer architecture (Vaswani et al., 2017) and use a modified multi-head attention layer. In particular, a linear transformation maps each node to a key, query and value vector:

$$K_{v_i}, Q_{v_i}, V_{v_i} = W_K v_i^t, W_Q v_i^t, W_V v_i^t \quad (22)$$

The attention value is usually computed based on the dot product between two nodes. However, as we explicitly have features for the edge between the two nodes, we use those to control the attention mechanism. Hence, we have an additional weight matrix  $u$  to map the edge features to an attention bias:

$$\hat{a}_{ij} = Q_{v_i} K_{v_j}^T / \sqrt{d} + e_{ij}^{t+1} u^T \quad (23)$$

where  $d$  represents the hidden dimensionality of the features. Finally, we also add a edge-based value vector to allow a full communication from edges to nodes. Overall, the updates node features are



calculated by:

$$a_{ij} = \frac{\exp(\hat{a}_{ij})}{\sum_m \exp(\hat{a}_{im})}, \quad (24)$$

$$\tilde{v}_i^{t+1} = \sum_j a_{ij} \cdot [V_{v_j} + W_e e_{ij}^{t+1}] \quad (25)$$

Alternatively to transformers, we also experimented with Graph Attention Networks (Veličković et al., 2018). However, those showed slightly worse results which is why we used the transformer-based layer.

In step 2, the (binary) adjacency matrix is given such that each node has a limited number of neighbors. A full transformer-based architecture as above is then not necessary anymore as every atom has usually between 1 and 3 neighbors. Especially the node-to-node dot product is expensive to perform. Hence, we experimented with a node update layer where the attention is purely based on the edge features in step 2. We found both to work equally well while the second is computationally more efficient.

## B.2 ENCODING GRAPH SIZE

The number of nodes  $N$  varies across graphs in the dataset, and hence a generative model needs to be flexible regarding  $N$ . To encode the number of nodes, we use a similar approach as Ziegler and Rush (2019) for sequences and add a simple prior over  $N$ . The prior is parameterized based on the graph size frequency in the training set. Alternatively, to integrate the number of nodes in the latent space, we could add *virtual* nodes to the model, similar to virtual edges. Every graph in the training dataset would be filled up to the maximum number of nodes (38 for Zinc250k (Irwin et al., 2012)) by adding such virtual nodes. Meanwhile, during sampling, we remove virtual nodes if the model generates such. GraphNVP (Madhawa et al., 2019) uses such an encoding as their coupling layers did not support flexible graph sizes. However, in experiments, we obtained similar performance with both size encodings while the external prior is computationally more efficient and therefore used in this paper.

## C ADDITIONAL RESULTS ON MOLECULE GENERATION

In this section, we present additional results on the molecule generation task. Table 4 shows the results of our model on the Zinc250k (Irwin et al., 2012) dataset including the likelihood on the test set in bits per node. We calculate this metric by summing the log-likelihood of all latent variables, both nodes, and edges, and divide by the number of nodes. Although the number of edges scales with  $\mathcal{O}(N^2)$ , a higher proportion of those are virtual and did not have a significant contribution to the likelihood. Thus, bits per node constitutes a good metric for comparing the likelihood of molecules of varying size. Additionally, we also report the standard deviation for all metrics over 4 independent runs. For this, we initialized the random number generator with the seeds 42, 43, 44, and 45 before creating the model. The specific validity values we obtained are 80.74%, 81.16%, 85.3% and 86.44% (in no particular order). It should be noted that the standard deviation among those models is considerably high. This is because the models in molecule generation are trained on maximizing the likelihood of the training dataset and not explicitly on generating valid molecules. We experienced that among over seeds, models that perform better in terms of likelihood do not necessarily perform better in terms of validity.

Table 4: Performance on molecule generation trained on Zinc250k (Irwin et al., 2012) with standard deviation is calculated over 4 independent runs. See Table 1 for baselines.

| Method       | Validity                 | Uniqueness               | Novelty                  | Reconstruction         | Bits per node             |
|--------------|--------------------------|--------------------------|--------------------------|------------------------|---------------------------|
| GraphCNF     | 83.41%<br>( $\pm 2.88$ ) | 99.99%<br>( $\pm 0.01$ ) | 100%<br>( $\pm 0.00$ )   | 100%<br>( $\pm 0.00$ ) | 5.17bpd<br>( $\pm 0.05$ ) |
| + Sub-graphs | 96.35%<br>( $\pm 2.21$ ) | 99.98%<br>( $\pm 0.01$ ) | 99.98%<br>( $\pm 0.02$ ) | 100%<br>( $\pm 0.00$ ) |                           |



We also evaluated GraphCNF on the Moses (Polykovskiy et al., 2018) molecule dataset. Moses contains 1.9 million molecules with up to 30 heavy atoms of 7 different types. Again, we follow the preprocessing of Shi et al. (2020) and represent molecules in kekulized form in which hydrogen is removed. The results can be found in Table 5 and show that we achieve very similar scores to the experiments on Zinc250k. Compared to the normalizing flow baseline GraphAF, GraphCNF generates considerably more valid atoms while being parallel in generation in contrast to GraphAF being autoregressive. JT-VAE uses manually encoded rules for generating valid molecules only such that the validity rate is 100%. Overall, the experiment on Moses validates that GraphCNF is not specialized on a single dataset but can improve on current flow-based graph models across datasets.

Table 5: Performance on molecule generation Moses (Polykovskiy et al., 2018), calculated on 10k samples and averaged over 4 runs. Score for GraphAF taken from Shi et al. (2020), and JT-VAE from Polykovskiy et al. (2018).

| Method                     | Validity                 | Uniqueness               | Novelty                | Bits per node             |
|----------------------------|--------------------------|--------------------------|------------------------|---------------------------|
| JT-VAE (Jin et al., 2018)  | 100%                     | 99.92%                   | 91.53%                 | -                         |
| GraphAF (Shi et al., 2020) | 71%                      | 99.99%                   | 100%                   | -                         |
| GraphCNF                   | 82.56%<br>( $\pm 2.34$ ) | 100.0%<br>( $\pm 0.00$ ) | 100%<br>( $\pm 0.00$ ) | 4.94bpd<br>( $\pm 0.04$ ) |
| + Sub-graphs               | 95.66%<br>( $\pm 2.58$ ) | 99.98%<br>( $\pm 0.01$ ) | 100%<br>( $\pm 0.00$ ) |                           |

Finally, we show 12 randomly sampled molecules from our model in Figure 11. In general, GraphCNF is able to generate a very diverse set of molecules with a variety of atom types. This qualitative analysis endorses the previous quantitative results of obtaining close to 100% uniqueness on 10k samples.

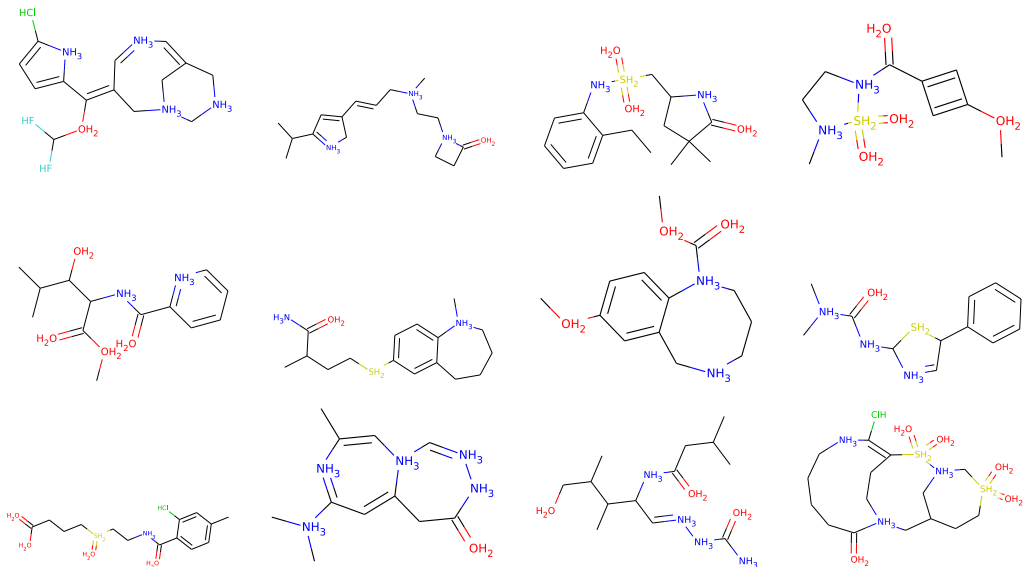

Figure 11: Visualization of molecules generated by GraphCNF which has been trained on the Zinc250k (Irwin et al., 2012) dataset. Nodes with black connections and no description represent carbon atoms. All of the presented molecules are valid. Best viewed in color and electronically for large molecules.

Besides generating multiple sub-graphs, the most common failure case we have found are single, invalid edges in a large molecule, as shown in four examples in Figure 12.

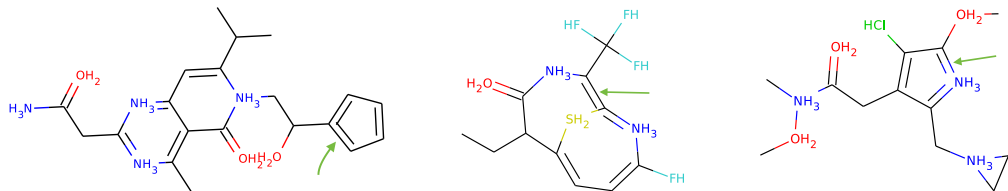

Figure 12: Failure cases in molecule generation besides sub-graph generation. The invalid edges have been indicated with a green arrow. Changing the edges to single bonds in the examples above would constitute a valid molecule.

## D EXPERIMENTAL SETTINGS

In this section, we detail the hyperparameter settings and datasets for all experiments. All experiments have been implemented using the deep learning framework PyTorch (Paszke et al., 2019). The experiments for graph coloring and molecule generation have been executed on a single NVIDIA TitanRTX GPU. The average training time was between 1 and 2 days. The set and language experiments have been executed on a single NVIDIA GTX1080Ti in 4 to 16 hours. All experiments have been repeated with at least 3 different random seeds.

### D.1 SET MODELING

**Dataset details** We use two toy datasets, set shuffling and set summation, to simulate a discrete distribution over sets in our experiments. Note that we do not have a classical split of train/val/test dataset, but instead train and test the models on samples from the same discrete distribution. This is because we want to verify whether a categorical normalizing flow and other baselines can model an arbitrary discrete distribution. The special property of sets is that permuting the elements of a set still represent the same set. However, a generative model still has to learn all possible permutations. While an autoregressive model considers those permutations as different data points, a permutation-invariant model as Categorical Normalizing Flow contains an inductive bias to assign the same likelihood to any permutation.

In set shuffling, we only have one set to model which is the following (with categories  $C_1$  to  $C_{16}$ ):

$$\{C_1, C_2, C_3, C_4, C_5, C_6, C_7, C_8, C_9, C_{10}, C_{11}, C_{12}, C_{13}, C_{14}, C_{15}, C_{16}\}$$

This set has  $16!$  possible permutations and therefore challenging to model. The optimal likelihood in bits per element is calculated by  $\log_2(16!)/16 \approx 2.77$ .

The dataset set summing contains of 2200 valid sets for  $N = 16$  and  $L = 42$ . An example for a valid set is:

$$\{1, 1, 1, 1, 2, 2, 2, 2, 2, 3, 3, 3, 3, 6, 8\}$$

For readability, the set is sorted by ascending values, although any permutation of the elements represent the exact same set. Taking into account all possible permutations of the sets in the dataset, we obtain a optimal likelihood of  $\log_2(6.3 \cdot 10^{10})/16 \approx 2.24$ . The values for the sequence length  $N$  and sum  $L$  was chosen such that the task is challenging enough to show the differences between Categorical Normalizing Flows and its baselines, but also not too challenging to prevent unnecessarily long training times and model complexities.

**Hyperparameter details** Table 6 shows an overview of the hyperparameters per model applied on set modeling. We use the notation “{val1, val2, ...}” to show the different values we have tried during hyperparameter search. Thereby, the underlined value denotes the hyperparameter value with the best performance and finally was being used to generate the results in Table 3.

The number of encoding coupling layers in Categorical Normalizing Flows are sorted by the used encoding distribution. The mixture model uses no additional coupling layers, while for the linear flows, we apply 4 affine coupling layers using an external input for the discrete category. For the variational encoding distribution  $q(z|x)$ , we use 4 mixture coupling layers across the all latent variables  $z$  with external input for  $x$ . A larger dimensionality of the latent space per element showed to be beneficial for all encoding distributions. Note that due to a dimensionality larger than 1 per

element, we can apply the channel mask instead of a chess mask and maintain permutation invariance compared to the baselines.

In variational dequantization and Discrete NF, we sort the categories randomly for set shuffling (the distribution is invariant to the category order/assignment) and in ascending order for set summation. In Discrete NF, we followed the published code from [Tran et al. \(2019\)](#) for their coupling layers and implemented it in PyTorch ([Paszke et al. 2019](#)). We use a discrete prior over the set elements which is jointly optimized with the flow. However, we experienced significant optimization issues due to the straight-through gradient estimator in the Gumbel Softmax.

Across this paper, we experiment with the two optimizers Adam ([Kingma and Ba, 2015](#)) and RAdam ([Liu et al. 2020](#)), and experienced RAdam to work slightly better. The learning rate decay is applied every update and leads to exponential decay. However, we did not observe the choice of this hyperparameter to be crucial.

Table 6: Hyperparameter overview for the set modeling experiments presented in Table 3

| Hyperparameters     | Categorical NF | Var. dequant. | Discrete NF        |
|---------------------|----------------|---------------|--------------------|
| Latent dimension    | {2, 4, 6}      | 1             | 16                 |
| #Encoding couplings | - / 4 / 4      | 4             | -                  |
| #Coupling layers    | 8              | 8             | {4, 8}             |
| Coupling network    | Transformer    | Transformer   | Transformer        |
| - Number of layers  | 2              | 2             | 2                  |
| - Hidden size       | 256            | 256           | 256                |
| Mask                | Channel mask   | Chess mask    | Chess mask         |
| #mixtures           | 8              | 8             | -                  |
| Batch size          | 1024           | 1024          | 1024               |
| Training iterations | 100k           | 100k          | 100k               |
| Optimizer           | {Adam, RAdam}  | RAdam         | {SGD, Adam, RAdam} |
| Learning rate       | 7.5e-4         | 7.5e-4        | {1e-3, 1e-4, 1e-5} |
| Learning rate decay | 0.999975       | 0.999975      | 0.999975           |
| Temperature (GS)    | -              | -             | {0.1, 0.2, 0.5}    |

## D.2 GRAPH COLORING

**Dataset details** In our experiments, we focus on the 3-color problem meaning that a graph has to be colored using  $K = 3$  colors. We generate the datasets by randomly sampling a graph and using an SAT solver<sup>2</sup> for finding one valid coloring assignment. In case no solution can be found, we discard the graph and sample a new graph. We further ensure that every graph cannot be colored by less than 3 colors to exclude too simple graphs. For creating the graphs, we take inspiration from [Lemos et al. \(2019\)](#) and first uniformly sample the number of nodes between  $10 \leq |V| \leq 20$  for the small dataset, and  $25 \leq |V| \leq 50$  for the large dataset. Next, we sample a value  $p$  between 0.1 and 0.3 which represents the probability of having an edge between a random pair of nodes. Thus,  $p$  controls how dense a graph is, and we aim to have both dense and sparse graphs in our dataset. Finally, for each pair of nodes, we sample from a Bernoulli distribution with probability  $p$  of adding an edge between the two nodes or not. Finally, we check whether each node has at least one connection and that all nodes can be reached from any other node. This ensures that we have one connected graph and not multiple sub-graphs. Overall, we create a train/val/test size of 192k/24k/24k for the small dataset, and 450k/20k/30k for the large graphs. We visualize examples of the datasets in Figure 13.

During training, we randomly permute the colors of a graph (e.g. red becomes blue, blue becomes green, green becomes red) as any permutation is a valid color assignment. When we sample a color assignment from our models, we explicitly use a temperature value of 1.0. For the autoregressive

<sup>2</sup>We have used the following solver from the OR-Tools library in python: [https://developers.google.com/optimization/cp/cp\\_solver](https://developers.google.com/optimization/cp/cp_solver)

model and the VAE, this means that we sample from the softmax output. A common alternative is to take the argmax, which corresponds to a temperature value of 0.0. However, we stick to the original distribution because we want to test whether the models capture the full discrete distribution of valid color assignments and not only the most likely solution. For the normalizing flow, a temperature of 1.0 corresponds to sampling from the prior distribution as it was used during training.

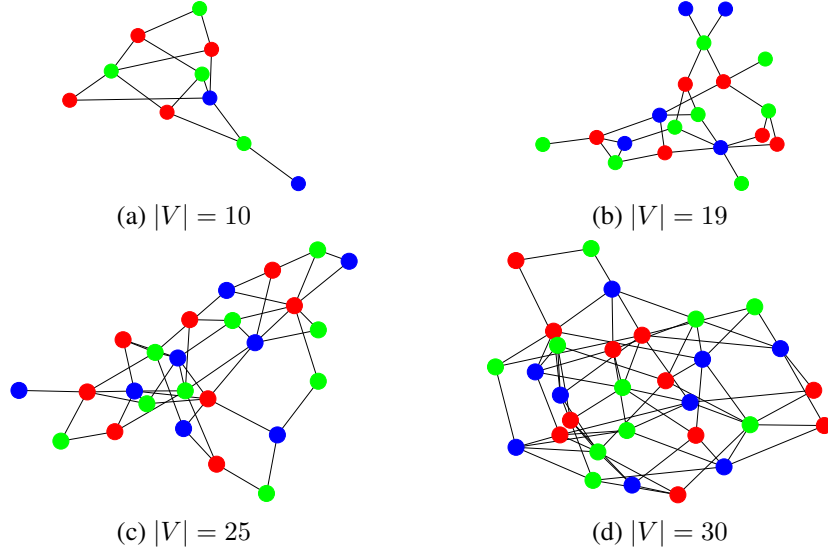

Figure 13: Examples of valid graph color assignments from the dataset (best viewed in color). Due to the graph sizes and dense adjacency matrices, edges can be occluded or cluttered in (c) and (d).

**Hyperparameter details** Table 7 shows an overview of the used hyperparameters. If “/” is used in the table, the first parameter refers to the hyperparameter value used on a small dataset and the second for the larger dataset. The activation function used within the graph neural networks is GELU (Hendrycks and Gimpel, 2016). Interestingly we experience that a larger latent space dimensionality is crucial for larger graphs despite having the same number of categories as the small dataset. This shows that having an encoding being flexible in the number of dimensions can be further important for datasets where complex relations between categorical variables need to be modeled. Increasing the number of dimensions on the small dataset did not show any significant differences in performance. The number of mixtures in the mixture coupling layers is in general beneficial to be large. However, this can also increase the sampling time. In the case of sampling time being crucial, the number of mixtures can be decreased for the tradeoff of slightly worse performance.

The input to the autoregressive model is the graph with the color assignment at time step  $T$  where each category including unassigned nodes is represented by an embedding vector. We experiment with an increasing number of hidden layers. While more layers are especially important for sub-optimal node ordering, the performance does not significantly improve for more than 5 layers. As the sampling time also increases linearly with the number of layers, we use 5 hidden layers for the models.

For the variational autoencoder, we encode each node by a latent vector of size 4. As VAEs have shown to benefit from slowly adding the KL divergence between prior and posterior to the loss, we experiment with a scheduler where the slope is based on a sigmoid and stretched over 10k iterations. We apply a 5 layer graph attention network for both the encoder and decoder. Increasing the number of layers did not show a significant gain while making the loss scheduling more difficult, which is why we stuck with 5 layers.

**Detailed results** Table 8 shows the standard deviation of the results reported in Table 2. Each model was run with 3 different seeds.

Table 7: Hyperparameter overview for graph coloring experiments presented in Table 2

| Hyperparameters     | GraphCNF                | Variational AE          | Autoregressive  |
|---------------------|-------------------------|-------------------------|-----------------|
| Latent dimension    | {2, 4} / {2, 4, 6, 8}   | 4                       | -               |
| #Coupling layers    | {6, 8}                  | -                       | -               |
| (Coupling) network  | GAT                     | GAT                     | GAT             |
| - Number of layers  | {3, 4, 5}               | 5                       | {3, 4, 5, 6, 7} |
| - Hidden size       | 384                     | 384                     | 384             |
| - Number of heads   | 4                       | 4                       | 4               |
| Mask                | Channel mask            | -                       | -               |
| #mixtures           | {4, 8, 16} / {4, 8, 16} | -                       | -               |
| Batch size          | 384 / 128               | 384 / 128               | 384 / 128       |
| Training iterations | 200k                    | 200k                    | 100k            |
| Optimizer           | RAdam                   | RAdam                   | RAdam           |
| Learning rate       | 7.5e-4                  | 7.5e-4                  | 7.5e-4          |
| KL scheduler        | -                       | {1.0, 0.1→0.5, 0.1→1.0} | -               |

Table 8: Results on the graph coloring problem, including standard deviation over 3 seeds. The column *time* is excluded since the execution time per batch is constant over seeds.

| Method             | $10 \leq  V  \leq 20$     |                        | $25 \leq  V  \leq 50$     |                        |
|--------------------|---------------------------|------------------------|---------------------------|------------------------|
|                    | Validity                  | Bits per node          | Validity                  | Bits per node          |
| VAE                | 44.95% $\pm$ 5.32%        | 0.84 $\pm$ 0.04        | 7.75% $\pm$ 1.59%         | 0.64 $\pm$ 0.02        |
| RNN+Smallest_first | 76.86% $\pm$ 0.84%        | 0.73 $\pm$ 0.02        | 32.27% $\pm$ 1.41%        | 0.50 $\pm$ 0.01        |
| RNN+Random         | 88.62% $\pm$ 0.65%        | 0.70 $\pm$ 0.01        | 49.28% $\pm$ 1.53%        | 0.46 $\pm$ 0.01        |
| RNN+Largest_first  | 93.41% $\pm$ 0.42%        | 0.68 $\pm$ 0.01        | <b>71.32%</b> $\pm$ 0.77% | <b>0.43</b> $\pm$ 0.01 |
| GraphCNF           | <b>94.56%</b> $\pm$ 0.55% | <b>0.67</b> $\pm$ 0.00 | 66.80% $\pm$ 1.14%        | 0.45 $\pm$ 0.01        |
| – Affine           | 93.90% $\pm$ 0.68%        | 0.69 $\pm$ 0.02        | 65.78% $\pm$ 1.03%        | 0.47 $\pm$ 0.01        |

### D.3 MOLECULE GENERATION

**Dataset details** The Zinc250k (Irwin et al., 2012) dataset we use contains 239k molecules of which we use 214k molecules for training, 8k for validation, and 17k for testing. We follow the preprocessing of Shi et al. (2020) and represent molecules in kekulized form in which hydrogen is removed. This leaves the molecules with up to 38 heavy atoms, with a mean and median size of about 23. The smallest graph consists of 8 nodes. Thereby, Zinc250k considers molecule with 8 different atom types where the distribution is significantly imbalanced. The most common atom is carbon with 73% of all nodes in the dataset. Besides oxygen (10%) and nitrogen (12%), the rest of the atoms occur in less than 2% of all nodes, with the rarest atom being Bromine (0.002%). Between those atoms, the dataset contains 3 different bonds or edge types, namely single, double and triple covalent bonds describing how many electrons are shared among the atoms. In over 90% of all node pairs there exist no bond. In 7% of the cases, the atoms are connected with a single connection, 2.4% with a double, and 0.02% with a triple connection. A similar imbalance is present in the Moses dataset and is based on the properties of molecules. Nevertheless, we experienced that GraphCNF was able to generate a similar distribution, where adding the third stage (adding virtual edges later) considerably helped to stabilize the edge imbalance.

**Hyperparameter details** We summarize our hyperparameters in Table 9. Generally, a higher latent dimensionality is beneficial for representing nodes/atoms, similar to the graph coloring task. However, we experienced that a lower dimensionality for edges is slightly better, presumably because the flow already has a significant amount of latent variables for edges. Many edges, especially the virtual ones, do not contain much information. Besides, a deeper flow showed to gain better results offering more complex transformations. However, in contrast to the graph coloring model, GraphCNF on

molecule generation requires a considerable amount of memory as we have to model a feature vector per edge. Nevertheless, we did not experience any issues due to the limited batch size of 96, and during testing, we could scale up the batch size easily to more than 128 on an NVIDIA GTX 1080Ti for both datasets.

Table 9: Hyperparameter overview for molecule generation experiments presented in Table 1 and 5

| Hyperparameters                      | GraphCNF                  |
|--------------------------------------|---------------------------|
| Latent dimension (V/E)               | {4, 6, 8} / {2, 3, 4}     |
| #Coupling layers ( $f_1/f_2/f_3$ )   | 4 / {4, 6} / {4, 6}       |
| Coupling network ( $f_1/f_{2,3}$ )   | Relational GCN / Edge-GNN |
| - Number of layers ( $f_1/f_2/f_3$ ) | {3/3/3, 3/4/4, 4/4/4}     |
| - Hidden size (V/E)                  | {256, 384} / {128, 192}   |
| Mask                                 | Channel mask              |
| #mixtures (V/E)                      | {8, 16} / {4, 8, 16}      |
| Batch size (Zinc250k/Moses)          | 64 / 96                   |
| Training iterations                  | 150k                      |
| Optimizer                            | RAdam (Liu et al., 2020)  |
| Learning rate                        | 2e-4, 5e-4, 7.5e-4, 1e-3  |

#### D.4 LANGUAGE MODELING

**Dataset details** The three datasets we use for language modeling are the Penn Treebank (Marcus et al., 1994), text8 and Wikitext103 (Merity et al., 2017). The Penn Treebank with a preprocessing of Mikolov et al. (2012) consists of approximately 5M characters and has a vocabulary size of  $K = 51$ . We follow the setup of Ziegler and Rush (2019) and split the dataset into sentences of a maximum length of 288. Furthermore, instead of an end-of-sentence token, the length is passed to the model and encoded by an external discrete prior which is created based on the sentence lengths in the training dataset.

Text8 contains about 100M characters and has a vocabulary size of  $K = 27$ . We again follow the preprocessing of Mikolov et al. (2012) and split the dataset into 90M characters for training, and 5M characters each for validation and testing. We train and test the models on a sequence length of 256.

In contrast to the previous two datasets, we use Wikitext103 as a word-level language dataset. First, we create a vocabulary and limit it to the most frequent 10,000 words in the training corpus. We thereby use pre-trained Glove (Pennington et al., 2014) embeddings to represent the words in the baseline LSTM networks and to determine the logistic mixture parameters in the encoding distribution of Categorical Normalizing Flows. Due to this calculation of the mixture parameters, we use a small linear network as a decoder. The linear network consists of three linear layers of hidden size 512 with GELU (Hendrycks and Gimpel, 2016) activation and output size of 10,000 (the vocabulary size). Similarly to text8, we train and test the models on an input sequence length of 256.

**Hyperparameter details** The hyperparameters for the language modeling experiments are summarized in Table 10. We apply the same hyperparameters for the flow and baseline if applicable. The best latent dimensionality for character-level is 3, although larger dimensionality showed to gain similar performance. For the word-level dataset, it is beneficial to increase the latent dimensionality to 10. However, note that 10 is still significantly smaller than the Glove vector size of 300. As Penn Treebank has a limited training dataset on which LSTM networks easily overfit, we use a dropout (Srivastava et al., 2014) of 0.3 throughout the models and dropout an input token with a chance of 0.1. The other datasets seemed to benefit slightly by a small input dropout to prevent overfitting at later stages of the training.

**Detailed results** Table 11 shows the detailed numbers and standard deviations of the results reported in Figure 4. Each model was run with 3 different seeds based on which the standard deviation has been calculated.

Table 10: Hyperparameter overview for the language modeling experiments presented in Table 11

| Hyperparameters       | Penn Treebank         | text8            | Wikitext103      |
|-----------------------|-----------------------|------------------|------------------|
| (Max) Sequence length | 288                   | 256              | 256              |
| Latent dimension      | {2, 3, 4}             | {2, 3, 4}        | {8, 10, 12}      |
| #Coupling layers      | 1                     | 1                | 1                |
| Coupling network      | LSTM                  | LSTM             | LSTM             |
| - Number of layers    | 1                     | 2                | 2                |
| - Hidden size         | 1024                  | 1024             | 1024             |
| - Dropout             | {0.0, 0.3}            | 0.0              | 0.0              |
| - Input dropout       | {0.0, 0.05, 0.1, 0.2} | {0.0, 0.05, 0.1} | {0.0, 0.05, 0.1} |
| #mixtures             | 51                    | 27               | 64               |
| Batch size            | 128                   | 128              | 128              |
| Training iterations   | 100k                  | 150k             | 150k             |
| Optimizer             | RAdam                 | RAdam            | RAdam            |
| Learning rate         | 7.5e-4                | 7.5e-4           | 7.5e-4           |

Table 11: Results on language modeling. The reconstruction error is shown in brackets.

| Model                    | Penn Treebank          | text8                  | Wikitext103            |
|--------------------------|------------------------|------------------------|------------------------|
| LSTM baseline            | 1.28 $\pm$ 0.01        | 1.44 $\pm$ 0.01        | 4.81 $\pm$ 0.05        |
| Latent NF - 1 layer      | 1.30 $\pm$ 0.01 (0.01) | 1.61 $\pm$ 0.02 (0.03) | 6.39 $\pm$ 0.19 (1.78) |
| Categorical NF - 1 layer | 1.27 $\pm$ 0.01 (0.00) | 1.45 $\pm$ 0.01 (0.00) | 5.43 $\pm$ 0.09 (0.32) |

## D.5 REAL-WORLD EXPERIMENTS

To verify that Categorical Normalizing Flows can also be applied to real-world data, we have experimented on a credit-card risk record (Dua and Graff, 2019). The data contains different categorical attributes regarding potential credit risk, and we have used the following 9 attributes: “checking\_status”, “credit\_history”, “savings\_status”, “employment”, “housing”, “job”, “own\_telephone”, “foreign\_worker”, and “class”. The task is to model the joint density function of those 9 attributes over a dataset of 1000 entries. We have used the first 750 entries for training, 100 for validation, and 150 for testing. The results are shown in Table 12. Both the LatentNF and CNF perform equally well, given the small size of the dataset and number of categories. The results have been averaged over three seeds. However, we experienced a relatively high standard deviation due to the small size of the training and test set.

Table 12: Results on credit card risk dataset (Dua and Graff, 2019). The reconstruction error is shown in brackets where applicable.

| Model                      | Likelihood in bpd      |
|----------------------------|------------------------|
| Variational Dequantization | 1.95 $\pm$ 0.04        |
| Latent NF                  | 1.36 $\pm$ 0.03 (0.01) |
| Categorical NF             | 1.37 $\pm$ 0.03 (0.00) |
